# Supplementary material for: Tumor-infiltrating CD8+ T cells recognize a heterogeneously expressed functional neoantigen in clear cell renal cell carcinoma
Source: Springer Nature journal article supplement (doi:10.1007/s00262-021-03048-6), 2021-09-07

**Figure S1**

**A**

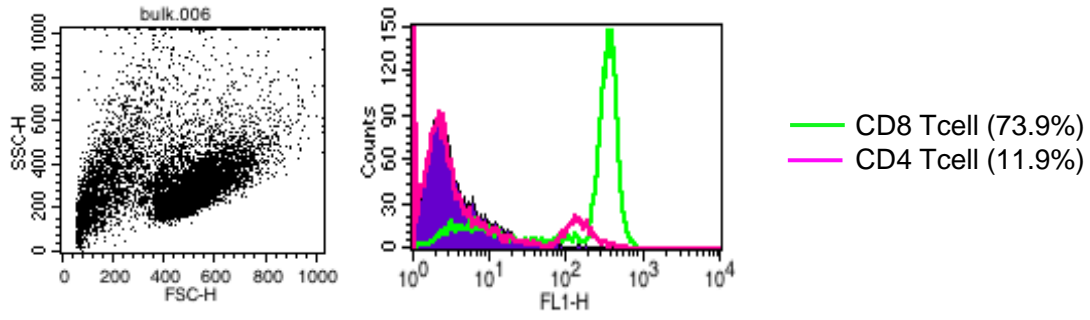

**B**

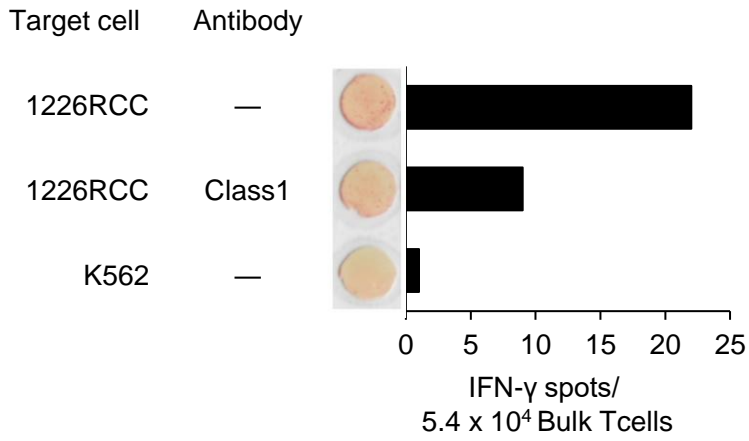

Figure S2.

**Red tumor**

CD4

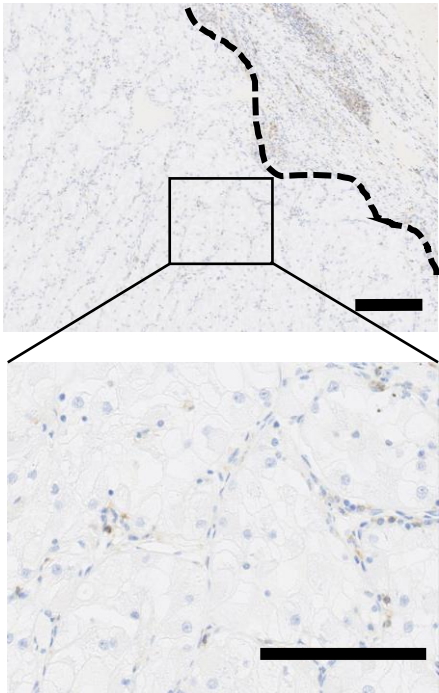

FoxP3(236A/E7)

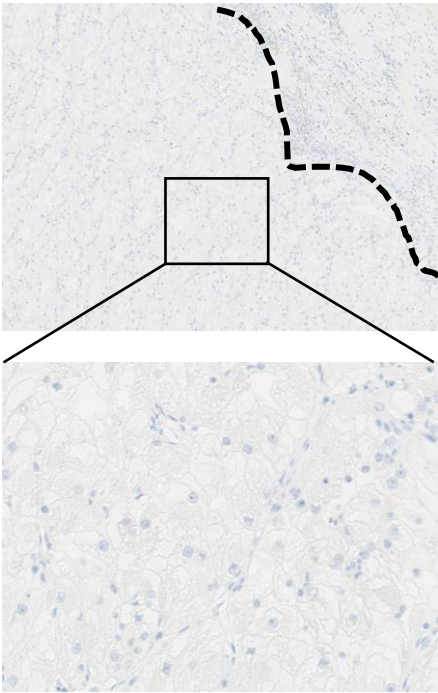

PD1 (NAT105)

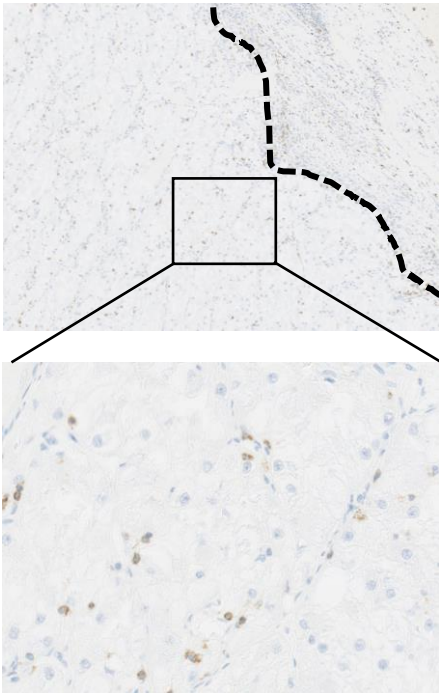

PD-L1 (E1L3N)

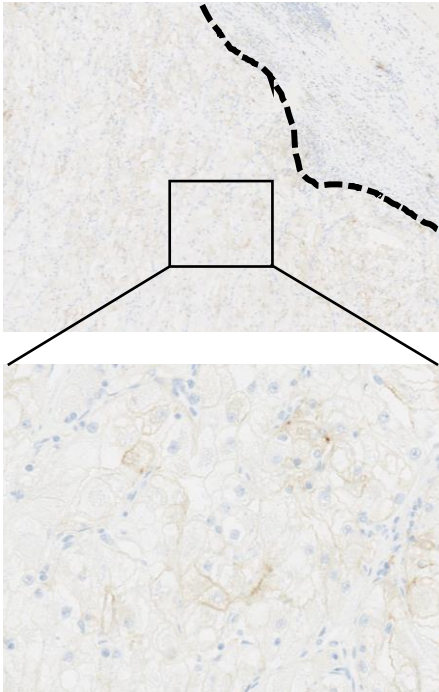

PD-L2 (MIH14)

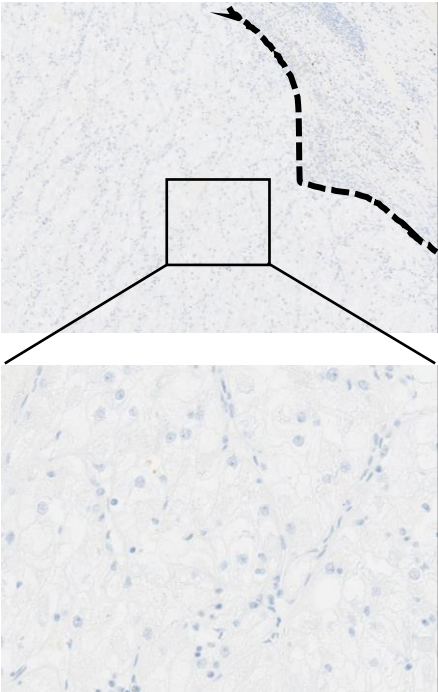

Figure S2.

**Yellow tumor**

CD4

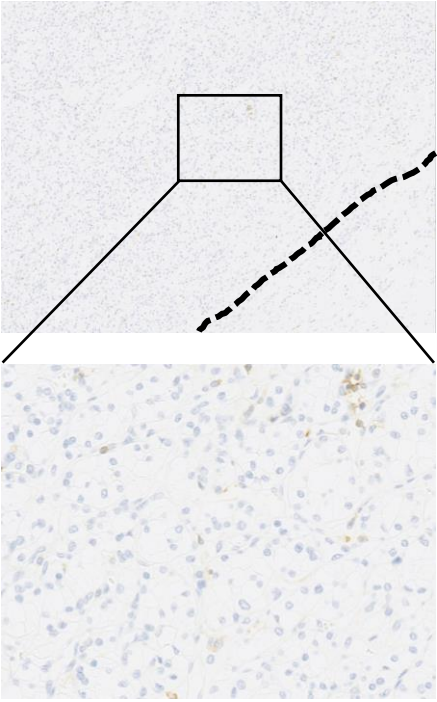

FoxP3(236A/E7)

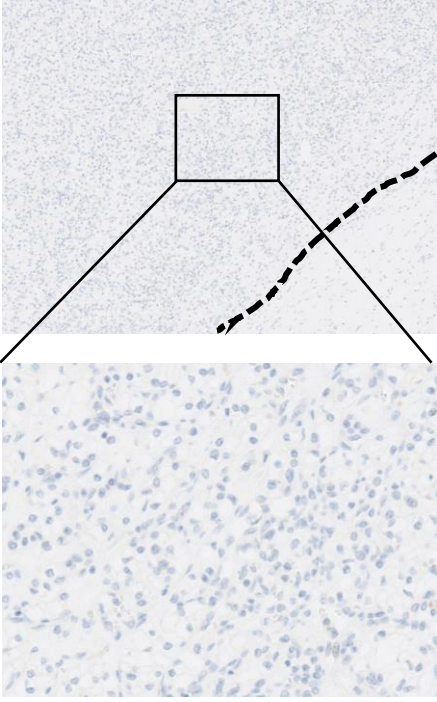

PD1 (NAT105)

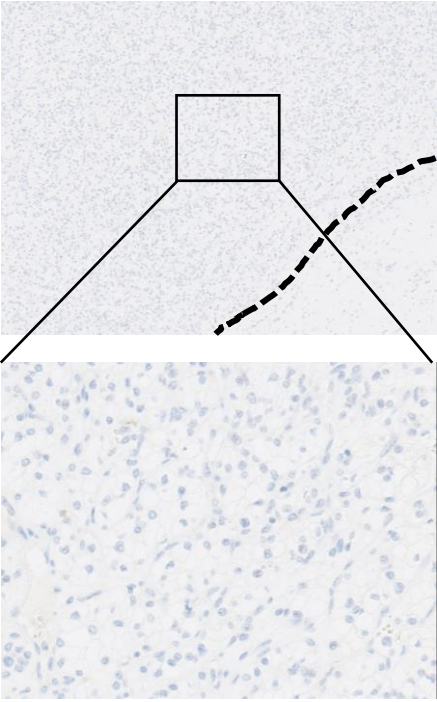

PD-L1 (E1L3N)

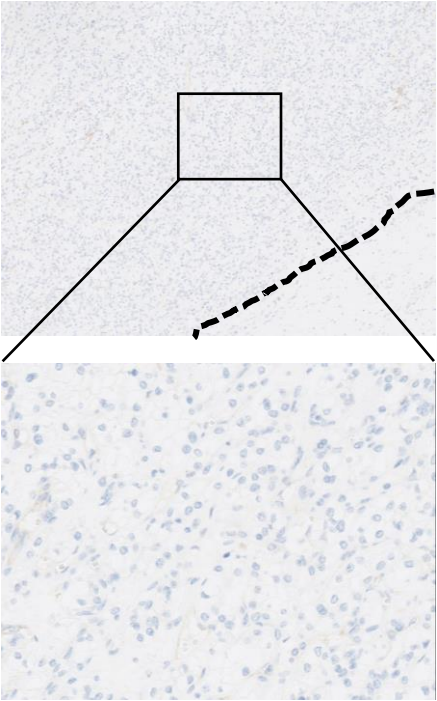

PD-L2 (MIH14)

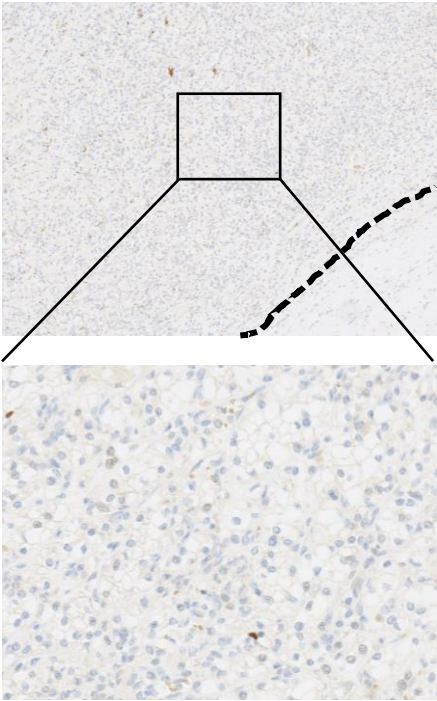

Supplement: 262_2021_3048_MOESM1_ESM.pdf [file 262_2021_3048_MOESM1_ESM.pdf]
