# Supplementary material for: Tumor-infiltrating CD8+ T cells recognize a heterogeneously expressed functional neoantigen in clear cell renal cell carcinoma
Source: Springer Nature journal article supplement (doi:10.1007/s00262-021-03048-6), 2021-09-07
Supplement: 262_2021_3048_MOESM2_ESM.pdf [file 262_2021_3048_MOESM2_ESM.pdf]

Supplemental Table S1. Summary of tandem mini genes (TMGs)

| TMG  | Gene No | mutation          | reference number of mRNA | protein change | Sequence                                |
|------|---------|-------------------|--------------------------|----------------|-----------------------------------------|
| TMG1 | 1       | missense mutation | NM_194315.1              | p.Gly243Arg    | NLAGLQQANRHRHLLGGALANLFVI               |
| TMG1 | 2       | missense mutation | NM_001289862.1           | p.Ala1016Thr   | PPMKNPSTASTLSTGSPMKNPS                  |
| TMG1 | 3       | missense mutation | NM_015074.3              | p.Thr421Ile    | TSVTSIQERIMSPJGGEEAIERLKE               |
| TMG1 | 4       | missense mutation | NM_004958.3              | p.Leu1550Val   | RDTHDGAFYRAVVALHQDLFLAQQ                |
| TMG1 | 5       | missense mutation | NM_006474.4              | p.Gln59Pro     | LGLWPRCFLIFPLRILLGPQESN                 |
| TMG1 | 6       | missense mutation | NM_016252.3              | p.Glu861Lys    | DLSVHKKHCSDSKGKEFKESHVSQP               |
| TMG1 | 7       | missense mutation | NM_018202.5              | p.Gln530Arg    | KKLTMDMKVKEDRIRELELKVQELR               |
| TMG1 | 8       | missense mutation | NM_182578.3              | p.Arg44Thr     | SAFGSSTDSMFSTFLPEKTDLKDYA               |
| TMG1 | 9       | missense mutation | NM_005547.2              | p.Gln172Arg    | EGHLKHLEQQEGRLLKHPQQEQGLE               |
| TMG1 | 10      | missense mutation | NM_003126.2              | p.Arg1076Cys   | YRSLLDRAEERRCRLLRQYNEFLLA               |
| TMG1 | 11      | missense mutation | NM_012231.4              | p.Leu1703Val   | SDVIPPTPKTTPVFMTPPLTPPNEA               |
| TMG2 | 12      | missense mutation | NM_001171603.1           | p.Ala92Val     | QENEKPLPENMDVFEKVRTKLETQP               |
| TMG2 | 13      | missense mutation | NM_001282597.1           | p.Ala365Glu    | TGRKEKGDPLNIEIDKMTKKTRDLR               |
| TMG2 | 14      | missense mutation | NM_015348.1              | p.Thr264Asn    | LHLELPTGQQGGNRKLWEIPPYETK               |
| TMG2 | 15      | missense mutation | NM_032143.3              | p.Arg787Ser    | SFQLKQYRSLILSFVREWSSLTAMK               |
| TMG2 | 16      | missense mutation | NM_022648.4              | p.Ser1309Tyr   | SPSLGRHLGGSGYVVPSPCLDRHV                |
| TMG2 | 17      | missense mutation | NM_015512.4              | p.Lys1868Asn   | HGLMLVGPTGSGNSTCYRVLAAAMT               |
| TMG2 | 18      | missense mutation | NM_015136.2              | p.Thr1365Met   | SGECHCHEGFHGMACEVCELGRYGP               |
| TMG2 | 19      | missense mutation | NM_005929.5              | p.Arg284Gln    | HLARVPAHAVVQADTDGGLIFRLL                |
| TMG2 | 20      | missense mutation | NM_001039127.5           | p.Ser312Leu    | EHKRIHAGEKRFLLCEECGNVFTSS               |
| TMG2 | 21      | missense mutation | NM_006259.2              | p.Leu437Arg    | KLKSKALSLEMIQRKEKVARFSSSSP              |
| TMG2 | 22      | missense mutation | NM_018717.4              | p.Ala1020Val   | ANTGTVRTLNPAVMGRQMMPPLPGQ               |
| TMG3 | 23      | missense mutation | NM_007193.4              | p.Glu141Lys    | EAYCLQYSNNLQKDIYSETSGHFRD               |
| TMG3 | 24      | missense mutation | NM_018429.2              | p.Glu162Gln    | KLREMLKEELRKQKQKQWKNKYAINE              |
| TMG3 | 25      | missense mutation | NM_022897.3              | p.Leu49Arg     | LIDSPECLSKCQRLLQEQGTTSYAQL              |
| TMG3 | 26      | missense mutation | NM_024872.2              | p.Gly95Asp     | KVWALLYAGGSPDVARLESWEVRDG               |
| TMG3 | 27      | missense mutation | NM_024872.2              | p.Ala90Ser     | KKCWRKVWALLYSGGPGSVARLESW               |
| TMG3 | 28      | missense mutation | NM_004666.2              | p.Gly335Val    | IEALSSGNKEFKVTVFFDEFVFKL                |
| TMG3 | 29      | missense mutation | NM_001042683.2           | p.Arg1220Pro   | REAVKNLEGPPSPNVIESATVCHLR               |
| TMG3 | 30      | missense mutation | NM_025059.3              | p.Gly662Ser    | LADFREVYSQMLSLNVTSLALPDYE               |
| TMG3 | 31      | missense mutation | NM_152701.4              | p.Ile4594Thr   | TMLITIMPRLLAISKAKNLQNIYD                |
| TMG3 | 32      | missense mutation | NM_001293626.1           | p.Ser2204Pro   | DTTSNSFSIMTTFSESTNAMNTTV                |
| TMG3 | 33      | missense mutation | NM_198495.2              | p.Gly735Val    | PPPPGTMGASRVYFPPRDFGPPH                 |
| TMG4 | 34      | missense mutation | NM_003575.2              | p.Met147Thr    | DCEKTAVEFGNHTESKWAVLGTLLQ               |
| TMG4 | 35      | missense mutation | NM_198584.2              | p.Ser207Thr    | YPGSLTVPPLELTVTWIVLQKPINI               |
| TMG4 | 36      | missense mutation | NM_015902.5              | p.Ala2014Val   | ATLNDKDDDSLPLVETGQNHFFRRS               |
| TMG4 | 37      | missense mutation | NM_133497.3              | p.Ala222Ser    | LSERLKIQHELRSQAQVEAEELFR                |
| TMG4 | 38      | missense mutation | NM_002072.4              | p.Thr96Ser     | FTAMQAMIRAMD <del>S</del> LKIPYKYEHNKA  |
| TMG4 | 39      | missense mutation | NM_153698.1              | p.Ser205Thr    | RDRNRDLHKPINTVLQVLGVQHVNF               |
| TMG4 | 40      | missense mutation | NM_001340.3              | p.Lys46Gln     | ALLFPKQRPQTQRRSKQQRDNT                  |
| TMG4 | 41      | missense mutation | NM_020824.3              | p.Pro796Leu    | KRMEERKASSTSLPGDSLASIPFID               |
| TMG4 | 42      | missense mutation | NM_032199.2              | p.Leu690Met    | LYSRGNPGIMSPMAKKKLLSQVSGA               |
| TMG4 | 43      | missense mutation | NM_017551.2              | p.Pro779Leu    | SKGYGIALQHGS <del>L</del> YRDLFSQRILEL  |
| TMG4 | 44      | missense mutation | NM_016341.3              | p.Asp1667Asn   | KKESRQIAPELSNLVIYQAVKFPFG               |
| TMG5 | 45      | missense mutation | NM_173791.3              | p.Leu25Met     | LGSFLTLLAQFFMLYRQPEPPADE                |
| TMG5 | 46      | missense mutation | NM_001244963.1           | p.Arg1134Gly   | GDESKKPLPSSSGTPTANANSFGFK               |
| TMG5 | 47      | missense mutation | NM_178570.2              | p.Gln277Arg    | CDCRARPLWAWFRARVSSSDVTCA                |
| TMG5 | 48      | missense mutation | NM_019021.3              | p.Ile141Ser    | DLRWCS <del>T</del> CSHSNSFEILVI        |
| TMG5 | 49      | missense mutation | NM_021957.3              | p.Ala137Val    | WNLD <del>R</del> WKGDLWEVCSVGIPYHDREA  |
| TMG5 | 50      | missense mutation | NM_003482.3              | p.Asp3579Gly   | VTEQSKIQKQLGQVVRKQKEHTNL                |
| TMG5 | 51      | missense mutation | NM_024902.2              | p.Tyr189Asn    | PLSVRLYRLGLANLAFTGPLAYSAL               |
| TMG5 | 52      | missense mutation | NM_002624.3              | p.Leu12Arg     | MAQSINITELNRPQLEMLKNQLDQ                |
| TMG5 | 53      | missense mutation | NM_175623.3              | p.Tyr417His    | KHRIKLGDSN <del>Y</del> HYISPFCRYRITS   |
| TMG5 | 54      | missense mutation | NM_014706.3              | p.Ala671Gly    | NVEVAAGPAGKCGAVDVEPPSKQKE               |
| TMG5 | 55      | missense mutation | NM_014868.4              | p.Ile249Leu    | ITRCGHIFCWACLLHYLSLSEKTSWS              |
| TMG6 | 56      | missense mutation | NM_018036.5              | p.Gly1992Cys   | HRLAHQPVDLRECVAKAYSVVKEGI               |
| TMG6 | 57      | missense mutation | NM_006291.2              | p.Ala250Thr    | LFPAEFGVAAAYTESYHQHFAAHLA               |
| TMG6 | 58      | missense mutation | NM_019074.3              | p.Cys184Ser    | RVICSDNYGDN <del>S</del> SRLCKKRNDFHG   |
| TMG6 | 59      | missense mutation | NM_022473.2              | p.Leu1250Val   | CPVYPVITARLSVPESTESFHEPSQ               |
| TMG6 | 60      | missense mutation | NM_004998.3              | p.Tyr745Cys    | RRNSINRNFIGDCIGMEEHPELQQF               |
| TMG6 | 61      | missense mutation | NM_144572.1              | p.Lys450Asn    | EQLGMLMETIQANDEVIILKSEGE                |
| TMG6 | 62      | missense mutation | NM_002952.3              | p.Val112Leu    | ASLKDEVLMKIMPLQKQTRAGQTRF               |
| TMG6 | 63      | missense mutation | NM_145254.1              | p.Phe43Ile     | GTLCPNSTLCSJPEM <del>W</del> YGVFLWAL   |
| TMG6 | 64      | missense mutation | NM_014853.2              | p.Glu10Gln     | MGSAEDAVKQKLLWNVKEVKQ                   |
| TMG6 | 65      | missense mutation | NM_001372.3              | p.Ser2752Arg   | FDDIEDPVEQTQRPNLYCHANGIG                |
| TMG7 | 66      | missense mutation | NM_003771.4              | p.Arg394Cys    | VKARLEGEIATYCHLLEGEDCKLPP               |
| TMG7 | 67      | missense mutation | NM_004758.3              | p.Arg1418His   | RRGGGSPEKPPSHRRPPDPREHCSR               |
| TMG7 | 68      | missense mutation | NM_005121.2              | p.Gln2136Pro   | NQTS <del>D</del> VLRFVLEPYNALSWLTCDDPA |
| TMG7 | 69      | missense mutation | NM_199242.2              | p.Arg27Thr     | LRQAIKIRRRRVTDLQDPPQMAPE                |
| TMG7 | 70      | missense mutation | NM_001941.4              | p.Val458Phe    | DIPRV <del>T</del> ALNRALFTVHVRDLDEGPE  |
| TMG7 | 71      | missense mutation | NM_020964.2              | p.Glu264Asp    | LVPFTKEQLKILDPG <del>S</del> WLENVESYL  |
| TMG7 | 72      | missense mutation | NM_144612.6              | p.Arg2155Ser   | RFFLETLELGELSKVRLEHDSSGYC               |
| TMG7 | 73      | missense mutation | NM_133475.1              | p.Arg730Cys    | SEKLQVELETRICGLEEALRQREFE               |
| TMG7 | 74      | missense mutation | NM_012335.3              | p.Val23Leu     | SHNVKQSGVDDMLLLPQITEDIAIA               |

|      |    |                   |                |                    |                                                                                                                   |
|------|----|-------------------|----------------|--------------------|-------------------------------------------------------------------------------------------------------------------|
| TMG7 | 75 | missense mutation | NM_020862.1    | p.Thr46Lys         | CPGRCICQNVAP <u>K</u> LTMLCAKTGLLF                                                                                |
| TMG8 | 76 | missense mutation | NM_052848.1    | p.Asp86Asn         | RLPVCSQQQGEPNLTEHEKVAILAQ                                                                                         |
| TMG8 | 77 | missense mutation | NM_001256849.1 | p.Met760Ile        | SAKVYVYGD <del>T</del> DSV <u>I</u> CRFGVSSVAEAM                                                                  |
| TMG8 | 78 | missense mutation | NM_138578.1    | p.Met159Thr        | GGALCVESVDKETQVLVSRIAAWMA                                                                                         |
| TMG8 | 79 | missense mutation | NM_018431.4    | p.Ile159Val        | PNLDVHGEALQV <u>T</u> YIEICLWDVQN                                                                                 |
| TMG8 | 80 | missense mutation | NM_001256355.1 | p.Ile111Met        | PDNPPYDKGAFR <u>M</u> EINFPAYPFKP                                                                                 |
| TMG8 | 81 | missense mutation | NM_001168465.1 | p.Glu683Asp        | LDGKSNLDDST <u>D</u> EVQSMDVSPVSK                                                                                 |
| TMG8 | 82 | missense mutation | NM_007052.4    | p.Leu365Val        | IHIRAAGDWTEN <u>V</u> IRAFEQQYSPIP                                                                                |
| TMG8 | 83 | missense mutation | NM_024657.4    | p.Thr849Asn        | AEFQILKAELERN <u>K</u> EEKQELKECLK                                                                                |
| TMG8 | 84 | missense mutation | NM_001152.4    | p.Val211Ile        | KGMLPDPKNTH <u>I</u> ISWMIQTVTAV                                                                                  |
| TMG8 | 85 | missense mutation | NM_001291527.1 | p.Lys143Ile        | VKEIRCLGRKYE <u>I</u> IFEMLEGVQGPT                                                                                |
| TMG9 | 86 | frameshift        | NM_032789.3    | p.Ala836fs         | AENTGEFQEVVRL <u>R</u> HPPGRCPQQHPRRSCGAR<br>VAPAAAA <u>V</u>                                                     |
| TMG9 | 87 | frameshift        | NM_001099661.1 | p.Asp290del        | AKKKHDKRSKRLE <u>E</u> EEEEEDNEGGEW                                                                               |
| TMG9 | 88 | frameshift        | NM_003950.2    | p.Asp362fs         | KVRAGLFRSPGAWPPR <u>P</u> LRKGAAGAWAPTP<br>LCSSDTKWGRLYWVEQGFPHFTSFLGPQNV<br>TFGNRVVTTVTSGGHFGEGWALHPVWV <u>S</u> |
| TMG9 | 89 | frameshift        | NM_014643.3    | p.Asp587_Glu588del | CAAADSPGSGLA <u>A</u> AEDSGEEGAPEP                                                                                |
| TMG9 | 90 | frameshift        | NM_006181.2    | p.Cys264fs         | GGRCKCNGHASR <u>S</u> AGHTGPPDLRLSAWHRGP                                                                          |
| TMG9 | 91 | frameshift        | NM_207380.2    | p.Glu227fs         | KGSWEPWSRPV <u>G</u> AGGGLGLCPVEAGAGADRP<br>SPPRPAQRRTG                                                           |
| TMG9 | 92 | frameshift        | NM_000551.3    | p.Lys159fs         | FANITLPVYTL <u>K</u> SDASRLSGA                                                                                    |
| TMG9 | 93 | frameshift        | NM_018313.4    | p.Met1331fs        | SAKKEGSKRKIN <u>I</u> VATSCSAVR                                                                                   |

Underlines indicate frameshifted amino acid sequence.
